# Supplementary material for: Mechanical Properties of Ternary Composite from Waste Leather Fibers and Waste Polyamide Fibers with Acrylonitrile-Butadiene Rubber
Source: MDPI journal article supplement (doi:10.3390/polym15112453), 2023-05-25
Supplement: s1 [file s1]

*Supporting Information*

# Mechanical Properties of Ternary Composite from Waste Leather Fibers and Waste Polyamide Fibers with Acrylonitrile-Butadiene Rubber

Le Thuy Hang <sup>1</sup>, Quoc-Viet Do <sup>2,\*</sup>, Luu Hoang <sup>1</sup>, Luc The Nguyen <sup>1</sup>, Nguyen Pham Duy Linh <sup>3,\*</sup> and Vu Anh Doan <sup>3,\*</sup>

<sup>1</sup> Faculty of Garment Technology and Fashion Design, Hung Yen University of Technology and Education, Hung Yen 160000, Vietnam; hanglt1983@gmail.com (L.T.H.); luugiaphucloc@gmail.com (L.H.); nguyentheluc82@gmail.com (L.T.N.)

<sup>2</sup> School of Material Science, Japan Advanced Institute of Science and Technology, 1-1 Asahidai, Ishikawa, Nomi 923-1292, Japan

<sup>3</sup> Center for Polymer Composite and Paper, Hanoi University of Science of Technology, Hanoi 100000, Vietnam

\* Correspondence: doquocviet@jaist.ac.jp (Q.-V.D.); linh.nguyenphamduy@hust.edu.vn (N.P.D.L.); vu.doananh@hust.edu.vn (V.A.D.)

**Keywords:** acrylonitrile-butadiene rubber; fiber reinforced composite; waste leather; waste polyamide

## Supporting Information

Herein, further information is provided about the FT-IR spectrum of raw polyamide fiber (PA) and ground waste leather (LF) used in this work (**Figure S1** and **Figure S2**). The morphology of LF is shown in **Figure S3**. The high-resolution FE-SEM images of NBR/LF/PA are shown in **Figure S4** to prove the good adhesion between PA fiber and NBR.

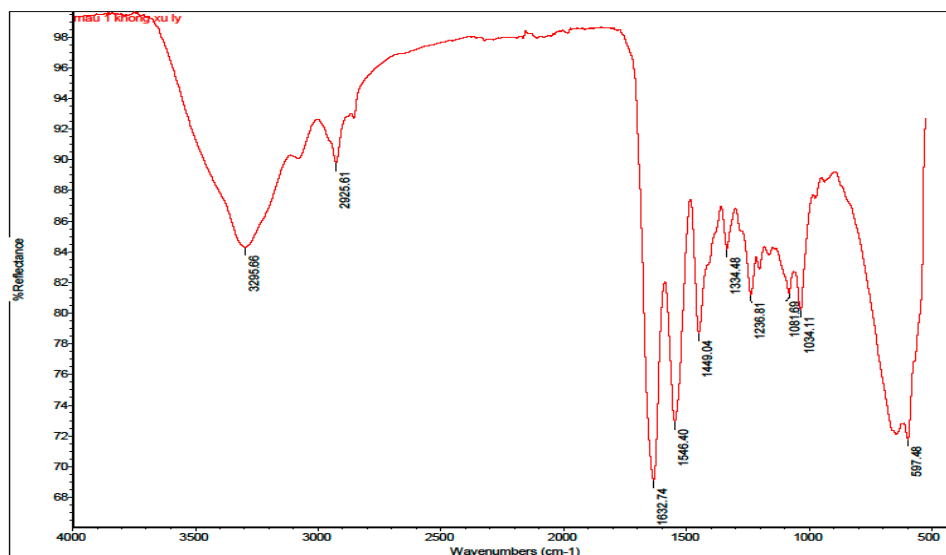

**Figure S1.** FT-IR spectrum of ground waste leather (LF).

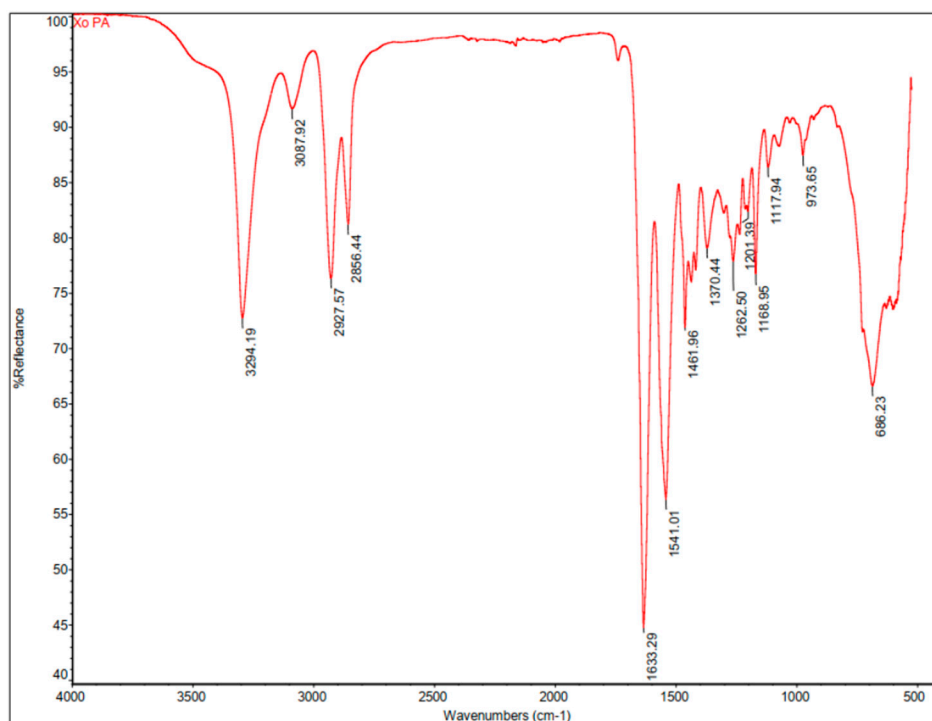

**Figure S2.** FT-IR spectrum of waste polyamide (PA).

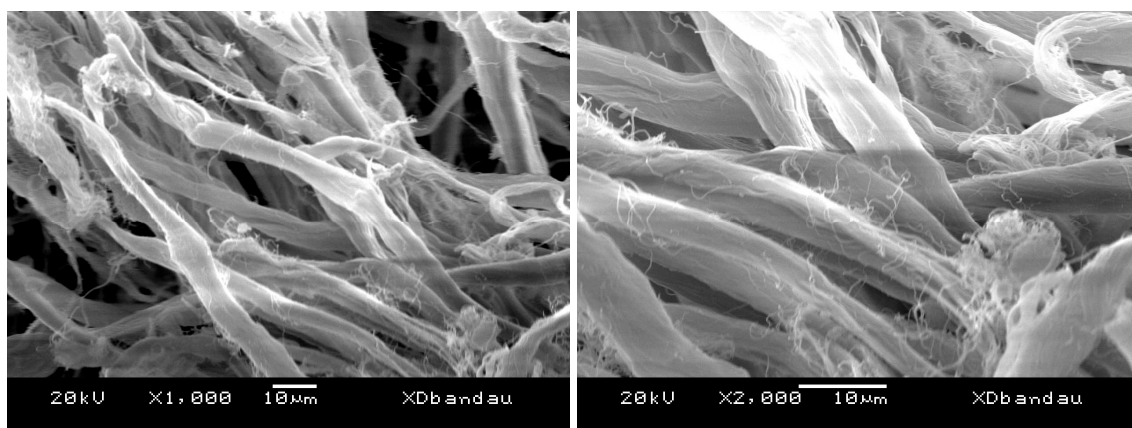

**Figure S3.** Morphology of ground waste leather (LF).

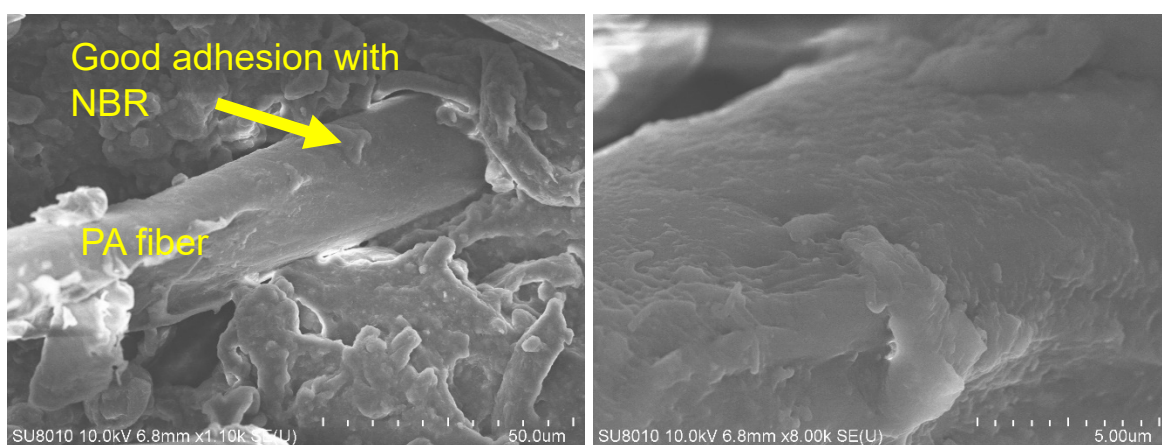

**Figure S4.** High-resolution FE-SEM images of composite NBR/LF/PA.
